# Supplementary material for: Rapid and Accurate Multiple Testing Correction and Power Estimation for Millions of Correlated Markers
Source: PubMed Central journal article supplement (PMC2663787; doi:10.1371/journal.pgen.1000456), 2009-04-17

# Rare SNP-eliminated analysis

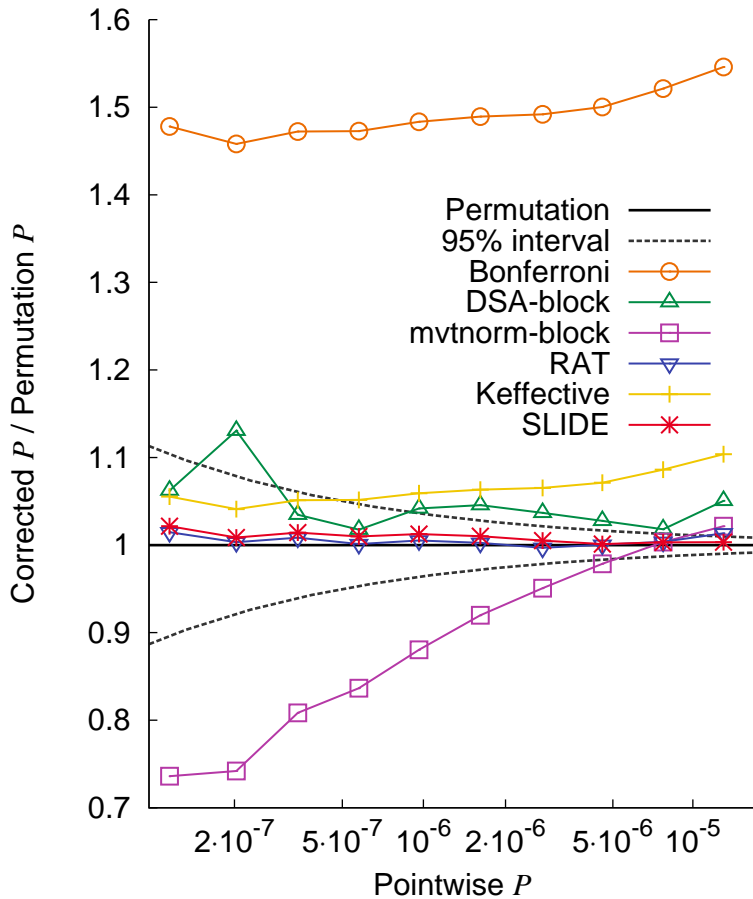

Supplement: pgen.1000456.s001.pdf [file pgen.1000456.s001.pdf]
